# Supplementary material for: Computing Extreme Storm Surges in Europe Using Neural Networks
Source: Copernicus journal article supplement (doi:10.5194/egusphere-2025-196), 2025-02-03
Supplement: Supplementary file [file egusphere-2025-196-AC2-supplement.pdf]

## Reviewer 2

This paper presents an investigation into the use of neural networks (NNs) for predicting extreme storm surges. The core contribution is the application and evaluation of a cost-sensitive learning approach (DenseLoss) to specifically improve the prediction of the rare, high-impact events. Two NN architectures (LSTM and ConvLSTM) were compared against both a simpler statistical model (MLR) and a hydrodynamic model (GTSM) across nine European tide-gauge locations. This is a well-written paper on an interesting topic. I believe the manuscript could be strengthened by considering the following points.

We thank the reviewer for their positive feedback and the opportunity to strengthen our manuscript.

The paper identifies data imbalance as a major issue, but the choice of DenseLoss needs stronger justification. It's basically a simple re-weighting technique—and more advanced options (like SMOGN) can be used?

We agree that the underrepresentation of extreme events in regression tasks form a nontrivial challenge, which we emphasize has not yet been addressed in the context of predicting extreme storm surges. Indeed, several strategies have been proposed to handle data imbalance, including data-level approaches like SMOGN (Branco et al., 2017). In our study, we deliberately opted for DenseLoss (Steininger et al., 2021) based on the following considerations:

- Unlike resampling strategies, cost-sensitive approaches like DenseLoss operate at the algorithm level and do not require altering the training dataset, thereby preserving the physical structure of the input data and avoiding degradation of generalization due to the addition of redundant or noisy samples. We feel the former is an especially relevant drawback in our case as interpolating between high-dimensional and structured spatiotemporal atmospheric data (9 time steps, 20 by 20 grid cells, 4 variables) to generate new synthetic events is not trivial and may violate physical consistency.
- The DenseLoss method is straightforward to implement and scale in deep learning pipelines while maintaining a consistent and stable training process across different locations. It includes a single interpretable hyperparameter ( $\alpha$ ) that allows users to control the emphasis on rare samples via kernel density estimation on the observed target distribution. In contrast, implementing SMOGN would require the definition of a (location-dependent) relevance function and thresholds for binning the original training data, and configuring complex feature interpolation schemes, particularly given the nature of our predictor data.
- Although applied in a different setting, Steininger et al. (2021) showed that DenseLoss consistently outperforms SMOGN across both synthetic and real-world datasets, while requiring fewer assumptions about the distribution of the training data.

To better justify our choice for DenseLoss in the manuscript, we will add a summary of these considerations to Section 2.3:

*“Therefore, we implemented the cost-sensitive learning approach DenseLoss (Steininger et al., 2021), which is an algorithm-level method that reweights the loss function based on the rarity of target values. In contrast to resampling methods such as Synthetic Minority*

*Oversampling with Gaussian Noise (SMOGN; Branco et al., 2017), DenseLoss does not alter the training data through synthetic oversampling, and therefore retains the physical consistency of the high-dimensional training data that we use. Furthermore, the additional emphasis placed on rare samples can be controlled through a single interpretable hyperparameter and does not require an a-priori relevance definition.” (L119), and a reference to the benchmarks of Steiniger et al. (2021) at the end of the paragraph.*

Does just up-weighting rare events actually help the model learn their complex, nonlinear physics, or does it merely force better scores on a few outliers while impacting overall physical consistency?

We argue that the DenseLoss method does not just force better scores on a few outliers because: (i) the introduction of density-based weights does not only improve the RMSE of the predictions of observed exceedances of the 99th percentile, but also the F1 score. This indicates that rather than reducing the prediction error of a few specific outliers, DenseLoss contributes to a better characterization of the extreme events in general; (ii) the very high extremes are still predominantly underestimated (Fig. 5d), which further supports that the models are not overcompensating by forcing better scores on those few highest-weighted target outliers.

To incorporate this in the manuscript, we will add: *“Our finding that using DenseLoss can improve both  $RMSE_{val}^{P99}$  and  $F1_{val}^{P99}$  suggests that reweighting the loss function does not simply reduce prediction errors of a few specific outliers but improves to the models’ overall representation of extremes”* to L196 and *“While this indicates that by density-based weighting, the neural networks are not overcompensating by forcing good scores on only a few high-weighted outliers,”* to L325.

The conclusions are based on an experimental setup with several fixed, important parameters—like using just nine tide gauges. Why these, and do they really capture Europe’s varied coastal dynamics?

The tide gauges were chosen based on their broad geographical coverage and the available tide gauge data during 1979-2017. The number of tide gauges was limited due to computational constraints. While we agree their locations may not exhaustively represent all European coasts, these tide gauges are diverse in terms of their shoreline orientation, tidal regime, locally important dynamics and the magnitude and distribution of observed extremes. These differences are reflected by the location-dependence of some of our results. We will clarify this rationale by elaborating L75-L77: *“Due to computational constraints, we limited our experiments to 9 tide gauges. While these may not be representative of all European coasts, they allow us to compare results across locations that are diverse in terms of shoreline orientation, dynamics, tidal regime and the magnitude and distribution of extremes.”*.

And how did you choose a  $5 \times 5^\circ$  domain and a 24-hour lookback? A sensitivity analysis would show whether your results hold up when these parameters change.

A  $5^\circ \times 5^\circ$  domain was chosen as a compromise between computational costs and the approximate length scales at which we expect remote winds and pressure to affect local water levels. A 24-hour lookback was chosen based on the approximate 48-hour duration of a storm surge, which under the assumption of a symmetrical hydrograph, implies that atmospheric information in the 24 hours preceding extreme water levels is most relevant.

Both these motivations will be added to the second paragraph of Section 2.1: “*This domain size was chosen as a compromise between computational costs and the approximate spatial scales at which we expect remote winds and sea-level pressure to be relevant*” and “*which was based on the assumption of a typical storm surge duration of approximately 48 hours.*”, respectively.

Given the aims of our study, we kept the domain and lookback window constant across the different locations, but we agree with the reviewer that gaining more insight into the sensitivity of the models to these parameters would be useful. Therefore, we carried out new sensitivity tests at one of the tide gauges (Esbjerg), varying the length of the lookback window (between 0, 12, 24 and 36 hours) and the predictor domain size (between 1 by 1, 3 by 3 and 5 by 5 degrees). We will include these experiments in a new appendix (Appendix A) and have copied the results below for the reviewer’s convenience.

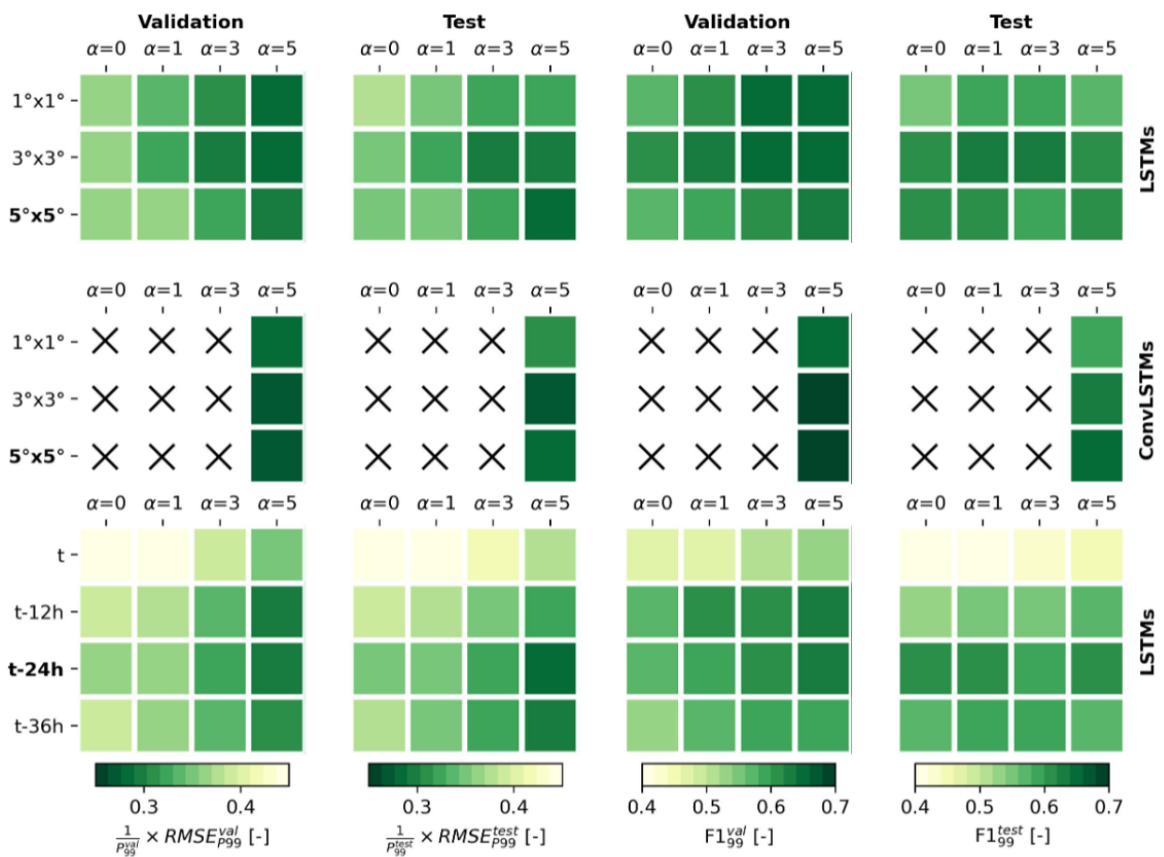

**Fig. A1 (bottom three rows).** Sensitivity of the average  $RMSE_{p_{99}}$  relative to  $P_{99} [-]$  and  $F1_{p_{99}} [-]$  of the LSTM and ConvLSTM models at Esbjerg (DK) to length of the look-back window (0, 12, 24 or 36 hours), and the domain size of the predictor data (1 by 1, 3 by 3 or 5 by 5 degrees), for different values of  $\alpha$ . The error metrics are shown for both the validation (1st and 3rd columns) and the test splits (2nd and 4th columns). The bold text on the left of the figure indicates the default settings used for the results in the main manuscript.

The new sensitivity tests indicate that the LSTM models trained with a predictor region of 3 by 3 or 5 by 5 degrees tend to outperform LSTM models trained with a domain size of 1 by 1 degrees, but not by much. The ConvLSTM models more clearly benefit from a larger domain

size than the LSTM models, and as a result, they outperform the LSTM models when using a predictor region of 3 by 3 or 5 by 5 degrees (as discussed in Section 4).

Secondly, we find that using a look-back window for the predictor data is clearly better for the performance of the LSTM models than using no look-back window, which is what several previous studies did. A look-back window of 24 hours seems to be approximately optimal, and increasing the look-back window to 36 hours does not further improve the performance of the models, at least not in this case.

Although we did not test different combinations of these settings and the optimal configuration of the predictor data may vary by location, the new sensitivity tests suggest our parameter choices are generally appropriate. Follow-up research could investigate fine-tuning the predictor data further. We will add this detailed discussion to Appendix A. Additionally, we will incorporate the headlines of these tests in the main manuscript by adding: *“Sensitivity tests at Esbjerg suggest that these parameter choices are generally appropriate (see Appendix A), although we acknowledge that the optimal configuration of the predictor data may vary by location. As shown in Appendix A, using a look-back window, which several previous studies did not do (Bruneau et al., 2020; Tiggeloven et al., 2021; Harter et al., 2024), clearly provides added value.”* to L85 and rewriting L322 to say that tuning the models more extensively, as proposed in Section 4, *“could also involve optimizing the variables, domain size and look-back window of the predictor data used at each tide-gauge location (see Appendix A).”*

Based on your results, the NNs still tend to underestimate the very highest extremes (99.9 percentile). Since accurate tail behavior is key for hazard assessment, it might help to investigate why this happens. Is it a smoothing effect in the ERA5 reanalysis, or a limit in the network’s ability to extrapolate even with DenseLoss? A brief investigation could really strengthen your conclusions.

We agree that accurately predicting storm surges in the upper tail is important. Our study forms a step toward that goal by addressing the underrepresentation of extremes in observations, which we emphasize is something that previous studies did not consider (e.g., Bruneau et al., 2020; Tiggeloven et al., 2021; Harter et al., 2024). Given this, we find that our results regarding the predominant underestimation of the exceedances of the 99.9th percentile despite density-based weighting and the performance of the neural networks relative to GTSM are both relevant and timely. As already discussed in Section 4, the predominant underestimation has different potential reasons, related to (1) limitations of the LSTM and ConvLSTM architectures, (2) the tuning of the models, (3) the training data used (and the temporal frequency of the ERA5 data in particular). In our view, disentangling these reasons would require dedicated follow-up research. To be more complete and explicit about potential follow-up studies that could shed more light on these aspects, we will make the following changes:

- We will add: *“Another reason for the predominant underestimation of exceedances of the 99.9th percentile could be the limited ability of the neural networks to extrapolate to the highest extremes, despite our use of DenseLoss.”* at the end of L325 to more clearly introduce the last two paragraphs discussing relevant follow-up research to address this.

- We will add: “more extensive hyperparameter tuning than we did here may help to reduce both the performance differences between locations and between the neural networks and GTSM, *including at predicting the highest extremes.*” (L321) to emphasize the potential for further optimizing the models that we use regarding the underestimation of the highest extremes.

Furthermore, as we previously referred to only briefly at the end of Section 2.4, Agulles et al. (2024) compared numerical ocean model simulations with either hourly or daily ERA5 forcing. They found that the latter leads to approximately 30-50% lower estimates of the 99.9th percentile of non-tidal residuals along European coastlines. Although the differences between hourly and 3-hourly forcing would likely be smaller and would need to be tested to draw definitive conclusions, the results of Agulles et al. (2024) suggest that the temporal frequency of the ERA5 data that we used does contribute to the underestimation of the observed exceedances of the 99.9th percentile by our data-driven models, and provide a rough quantitative idea of the upper limit on how much. We will therefore also add the following to the discussion (L326):

*“Agulles et al. (2024) found that by using daily instead of hourly atmospheric forcing, their hydrodynamic model underestimated the 99.9th percentile of non-tidal residuals by approximately 30-50%. While the underestimation with 3-hourly instead of hourly forcing would likely be less severe, their results suggest that the difference in the temporal frequency of the forcing of the neural networks and GTSM explains the differences in their tail behaviour at least partially. Future work could investigate this further by running a hydrodynamic model with 3-hourly forcing.”*

Noting that the best  $\alpha$  parameter changes from site to site raises practical challenges: is the model capturing general patterns or simply fitting each location’s unique data distribution? If you must tune  $\alpha$  for every gauge, rolling this out to hundreds of sites becomes both computationally heavy and methodologically challenging.

We thank the reviewer for highlighting the practical implications of our finding that the optimal  $\alpha$  value for reweighting depends on the location, and agree that introducing an additional parameter to tune at each location makes large-scale deployment more challenging. At the same time, we emphasize that our finding intuitively makes sense because the (tails of the) distribution of observed water levels varies by location.

Nevertheless, our results in Fig. 2 suggest that even for a diverse set of locations, a common value for  $\alpha > 0$  can be found that improves the performance of the data-driven models at predicting extremes at all including locations, even though it may not lead to the most optimal performance at every location individually.

Tuning  $\alpha$  for a large number of locations could be automated using meta-learning or Bayesian optimization techniques (e.g., Feurer and Hutter, 2019). Alternatively, the optimal weighting could be estimated from distributional features of the training data — such as target skewness or tail heaviness — using learned heuristics or data-driven priors. More practically, we envision clustering locations based on the similarity of the characteristics and distribution of their extremes (e.g., Calafat & Marcos, 2020; Rashid et al., 2024), and tuning the DenseLoss method for a reasonable number of such clusters. This could be done either by training separate models for each cluster of locations or by training multi-site models similar to the one of Kratzert et al. (2019) and incorporating cluster-specific loss weights.

As we agree with the reviewer this is an important point, we will add the following paragraph to the discussion: “*The optimal  $\alpha$  value for reweighting the loss function value likely varies by location because the distribution of the training data also varies by location. To apply the DenseLoss method to a larger number of locations, the location-dependent tuning of  $\alpha$  could be automated (e.g., Feurer and Hutter, 2019) or informed by the distributional features of the training data, such as target skewness and tail heaviness. More practically,  $\alpha$  could be tuned for a limited number of clusters of locations with similar characteristics and distributions (e.g., Calafat and Marcos, 2020; Rashid et al., 2024). This could either be done by training cluster-specific models or by training a single model incorporating cluster-specific attributes and weights (e.g., Kratzert et al., 2019). Our results in Figure 2 suggest that even for a diverse set of locations, a common value for  $\alpha > 0$  can be found that improves the performance of the data-driven models at predicting extremes at all locations, even though it may not lead to the most optimal performance at every location individually.*” (L282).

Feurer, M. and Hutter, F., 2019. Hyperparameter optimization. In *Automated machine learning: Methods, systems, challenges* (pp. 3-33). Cham: Springer International Publishing.

F.M. Calafat, & M. Marcos, Probabilistic reanalysis of storm surge extremes in Europe, *Proc. Natl. Acad. Sci. U.S.A.* 117 (4) 1877-1883, <https://doi.org/10.1073/pnas.1913049117> (2020).

Morim, J., Wahl, T., Rasmussen, D.J. et al. Observations reveal changing coastal storm extremes around the United States. *Nat. Clim. Chang.* 15, 538–545 (2025). <https://doi.org/10.1038/s41558-025-02315-z>

Kratzert, F., Klotz, D., Shalev, G., Klambauer, G., Hochreiter, S. and Nearing, G., 2019. Towards learning universal, regional, and local hydrological behaviors via machine learning applied to large-sample datasets. *Hydrology and Earth System Sciences*, 23(12), pp.5089-5110.

Perhaps the comparison would be more balanced if both models used the same input cadence (ConvLSTM and GTSM). The ConvLSTM is driven by 3-hourly data, whereas GTSM benefits from hourly forcing, which may contribute to its sharper extreme peaks. Ideally, the authors could run GTSM on the same 3-hourly inputs; if that isn't feasible, a clearer justification for the differing cadences would be helpful.

We agree with the reviewer that the comparison likely favors GTSM because of its higher forcing frequency and ideally GTSM simulations with 3-hourly ERA5 forcing would be used. Unfortunately, Muis et al. (2020 & 2023) only ran GTSM with hourly forcing and we do not have the access nor capacity to run such simulations ourselves. We nevertheless used the GTSM simulation because it still forms a valuable benchmark for our data-driven models: where the performance of the data-driven models trained with 3-hourly forcing is close to that of GTSM forced with hourly data, the data-driven models clearly perform well, and where the data-driven models perform substantially worse compared to GTSM forced with hourly data, they would likely also perform worse than GTSM forced with 3-hourly data. To better explain why we use differing cadences in the manuscript, we will rewrite L185-188 to read: “*A limitation of the comparison with GTSM is that we trained the data-driven models with 3-hourly ERA5 data (see Section 2.1), but simulations of GTSM are only available forced with hourly instead of 3-hourly ERA5 data. As atmospheric forcing with a lower temporal resolution reduces the accuracy of storm surge models (Agulles et al., 2024), our comparison is biased towards GTSM in this regard. We will consider this for the interpretation of our results in the following sections.*”



The paper would be improved by a brief discussion of its findings in the context of other advanced architectures. The authors should consider contextualizing their work with respect to models like Graph Neural Networks (GNNs), hierarchical deep neural networks, and Gaussian Process models, which have been successfully applied to similar spatiotemporal problems. This would provide valuable perspective on why LSTM/ConvLSTM were chosen and how they fit within the rapidly evolving field.

Our primary objective was to build upon previous studies by studying cost-sensitive learning as a means to improve predictions of extreme storm surges, rather than extensively testing different machine-learning models. As described in Section 2.2, we therefore chose the models that were identified to perform best by a comparable previous study (Tiggeloven et al., 2021). Additionally, we argue that these architectures are appropriate for our data as they can capture temporal dependencies and local spatial structure, without requiring the explicit graph design of GNNs or the complexity of a hierarchical model. We will make this rationale more explicit by rephrasing L113-L115.

Recent advances in the field may indeed help to improve the prediction of storm surges. In the last paragraph of the discussion, we already highlighted several potential avenues for investigating alternative architectures, such as path signatures, attention mechanisms and physics-informed neural networks. As the models put forward by the reviewer are also promising for the prediction of storm surges, we agree that briefly discussing them is worthwhile. We will therefore expand the existing discussion by adding: *“Second, while we chose to use LSTMs and ConvLSTMs (see Section 2.2), follow-up research could investigate whether the predictions of the extreme storm surges can be improved with other, emerging model architectures. For instance, graph neural networks, hierarchical deep neural networks and gaussian process models have been found beneficial for short-term forecasting (Kyprioti et al., 2023; Jiang et al., 2024; Naeini et al., 2025), and may also be in our context. Graph neural networks in particular could help to predict storm surges at multiple related locations, capturing spatial dependencies by representing different locations as nodes of a graph.”*

Minor Comment:

Line 487 (Appendix A): "Regularization and normalization help to avoid overfitting..." It should be "Regularization and dropout help to avoid overfitting...". Batch normalization serves a different primary purpose (stabilizing and accelerating training).

Thank you for pointing this out. We will replace '*normalization*' with '*dropout*'.

#### **Additional changes (to be appended to both responses)**

1. We discovered a minor error in the stratification routine introduced in Section 2.1, where 1 year of input data was accidentally omitted at the locations Wick and Alicante. We fixed this error, trained the models again at these locations and will update the corresponding results throughout the paper where needed. Fixing the error led to only minor differences in the results.
2. Figure C1 (now D2) accidentally showed results for the test split, instead of for the validation split. We apologize for this mistake, and will replace the figure with its correct version (see below). As the general effect of  $\alpha$  on precision and recall is consistent across the validation and test splits, the discussion of Figure C1 (now D2)

in Section 3.1 will not need to be changed.

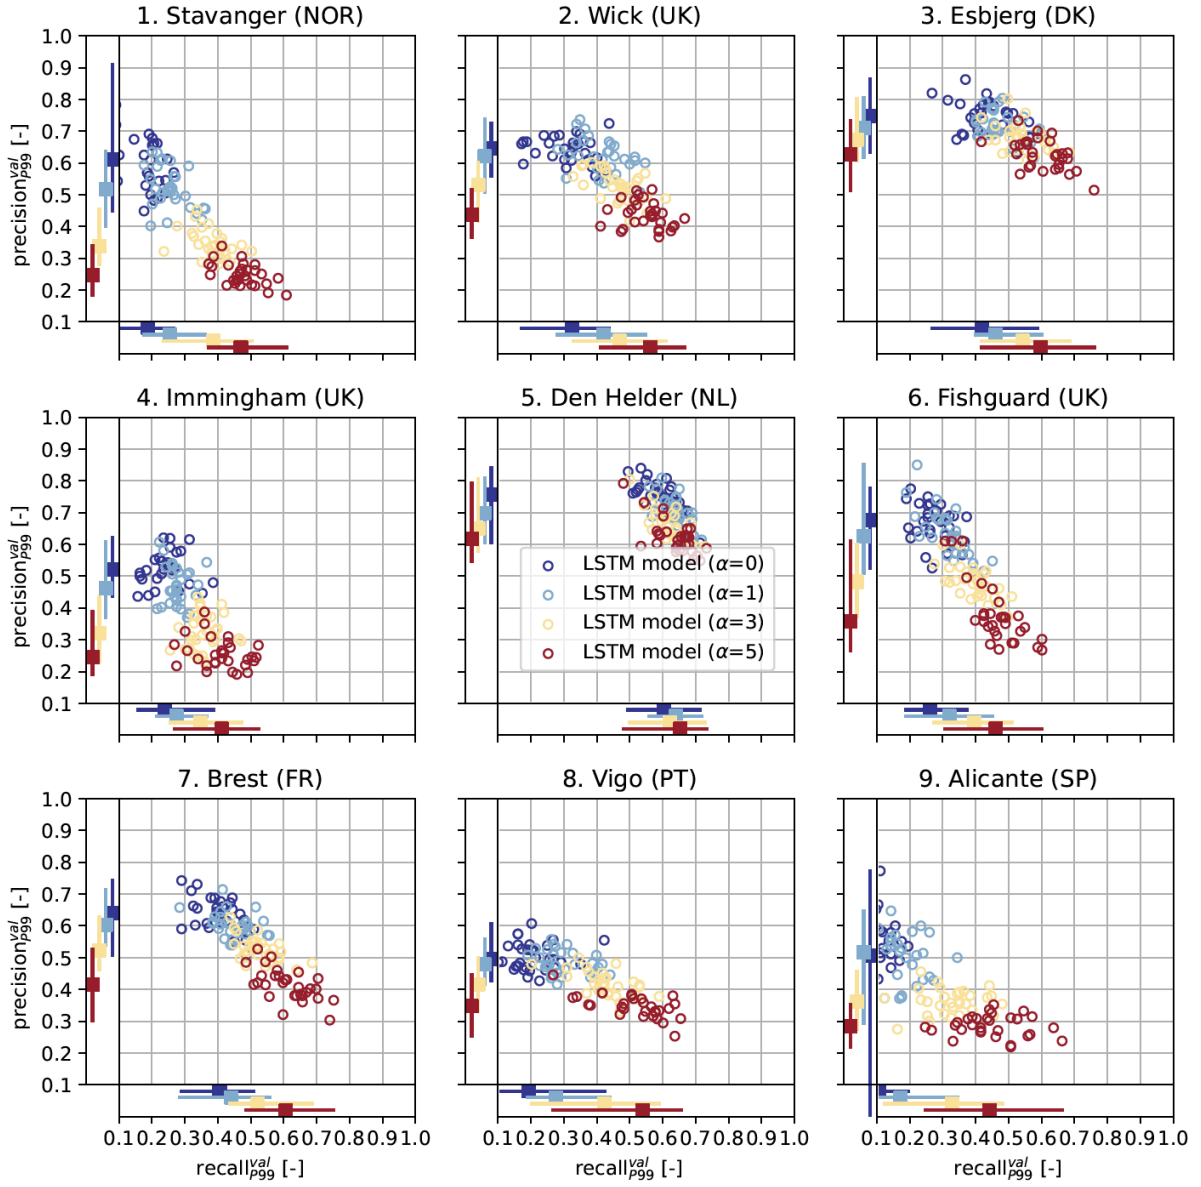

Corrected version of Fig. C1



3. Figure 4 aggregates results for all locations, which we realized makes it harder to inspect model generalization at individual locations. We will therefore complement Figure 4 with an additional supplementary figure (Figure D3) that shows the same results, but separated by location (see below).

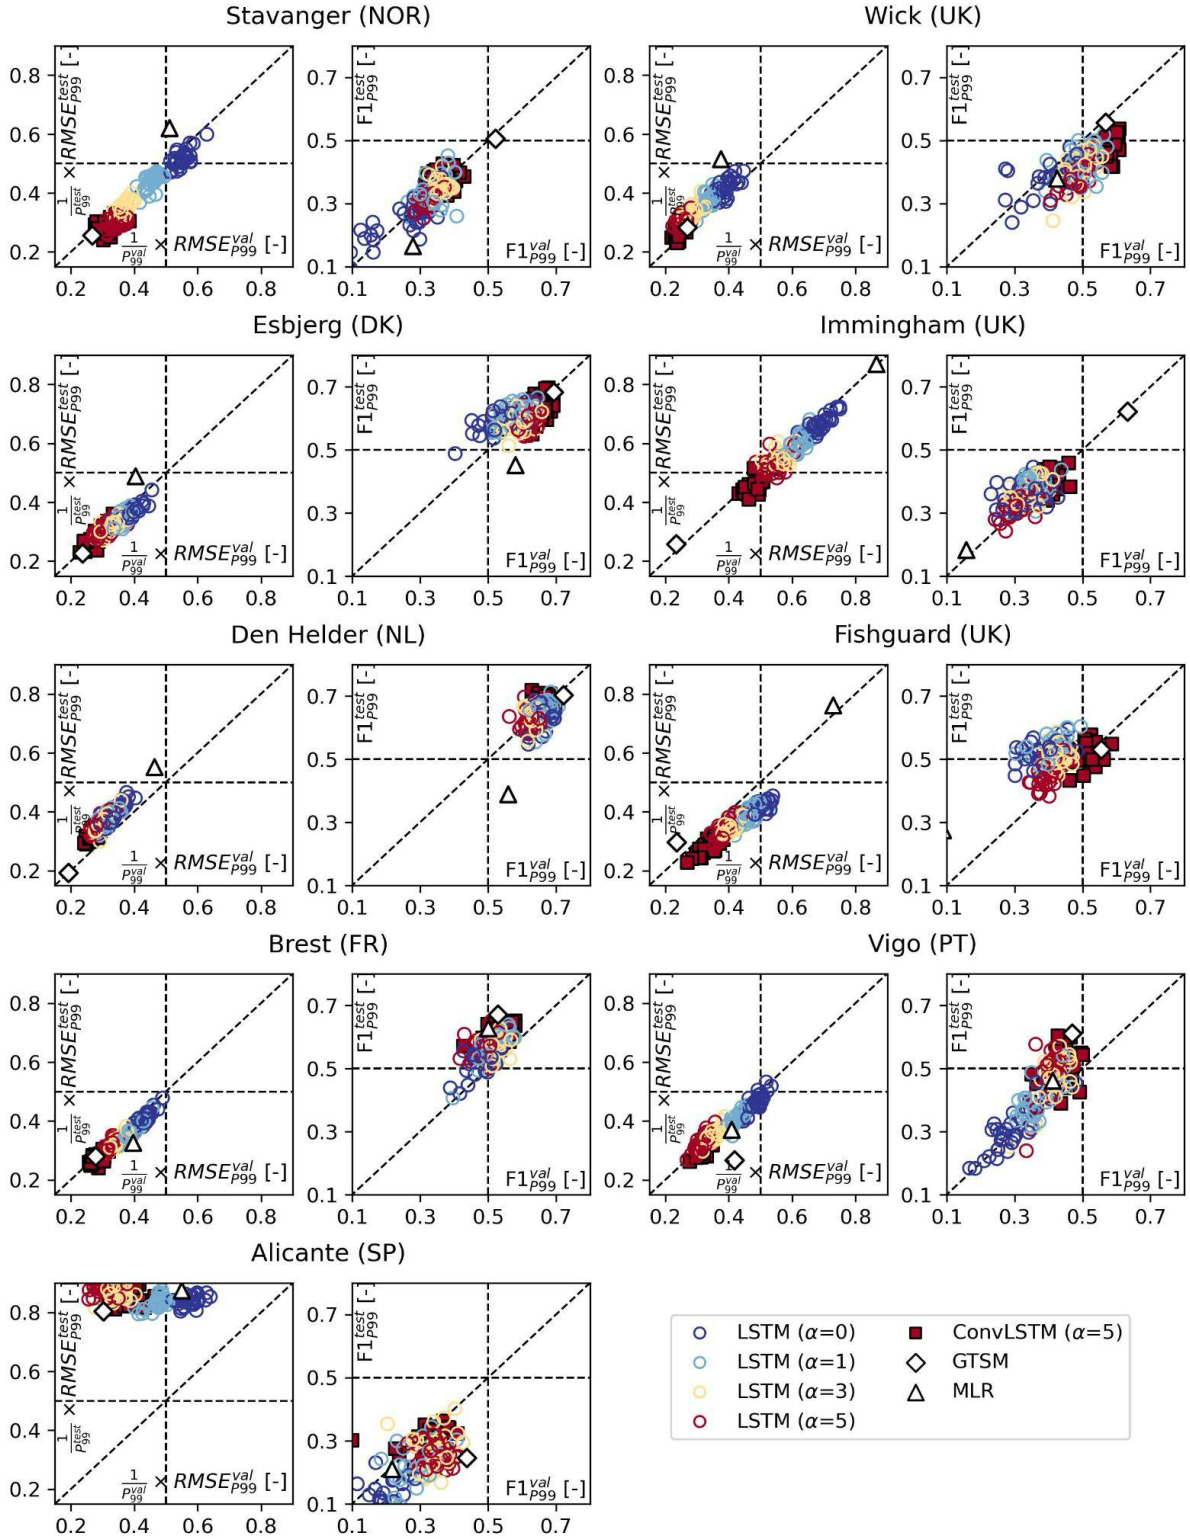

**Fig. D 3.** Scatter plots of  $RMSE_{P99}$  relative to  $P_{99} [-]$  and  $F1_{P99} [-]$  in the validation vs. in the test split, displayed per tide gauge. The colored circles represent the LSTM models for different values of  $\alpha$ , the black-edged red squares the ConvLSTM models for  $\alpha=5$ , and the

white triangles and diamonds the MLR model of Tadesse et al. (2020), and GTSM (Muis et al., 2020), respectively. The diagonal line in each panel indicates equal error metrics in the validation and test splits.

A few lines of discussion of Figure D3 will be added to Section 3.3: “Additionally, we find that increasing  $\alpha$  leads to a lower  $RMSE_{P99}$  in both the validation and test splits (Figure D3).” (L241), “With a few exceptions, increasing  $\alpha$  has an approximately similar effect on  $F1^{test}_{P99}$  as it has on  $F1^{val}_{P99}$  (Figure D3).” (L245), and “For optimal model generalization, we therefore recommend tuning  $\alpha$  alongside other important (hyper)parameters using  $k$ -fold cross-validation.” (L248).
